# Supplementary material for: Wild Patagonian yeast improve the evolutionary potential of novel interspecific hybrid strains for lager brewing
Source: PubMed Central journal article supplement (PMC11189258; doi:10.1371/journal.pgen.1011154), 2024-06-20
Supplement: pgen.1011154.s001.pdf [file pgen.1011154.s001.pdf]

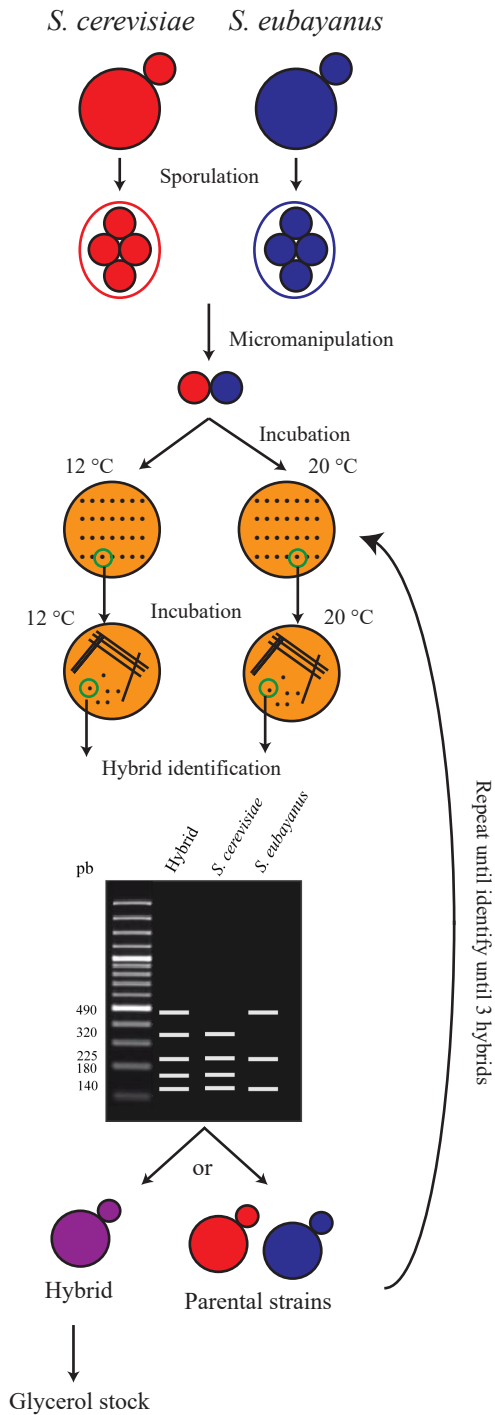

**Figure S1. Generation of interspecific *S. cerevisiae* x *S. eubayanus* hybrids.** Experimental procedure designed to generate and identify interspecific hybrids at two different temperatures (12 and 20°C).
