# Supplementary material for: Wild Patagonian yeast improve the evolutionary potential of novel interspecific hybrid strains for lager brewing
Source: PubMed Central journal article supplement (PMC11189258; doi:10.1371/journal.pgen.1011154), 2024-06-20
Supplement: pgen.1011154.s003.pdf [file pgen.1011154.s003.pdf]

## Fermentative capacity at 12 °C

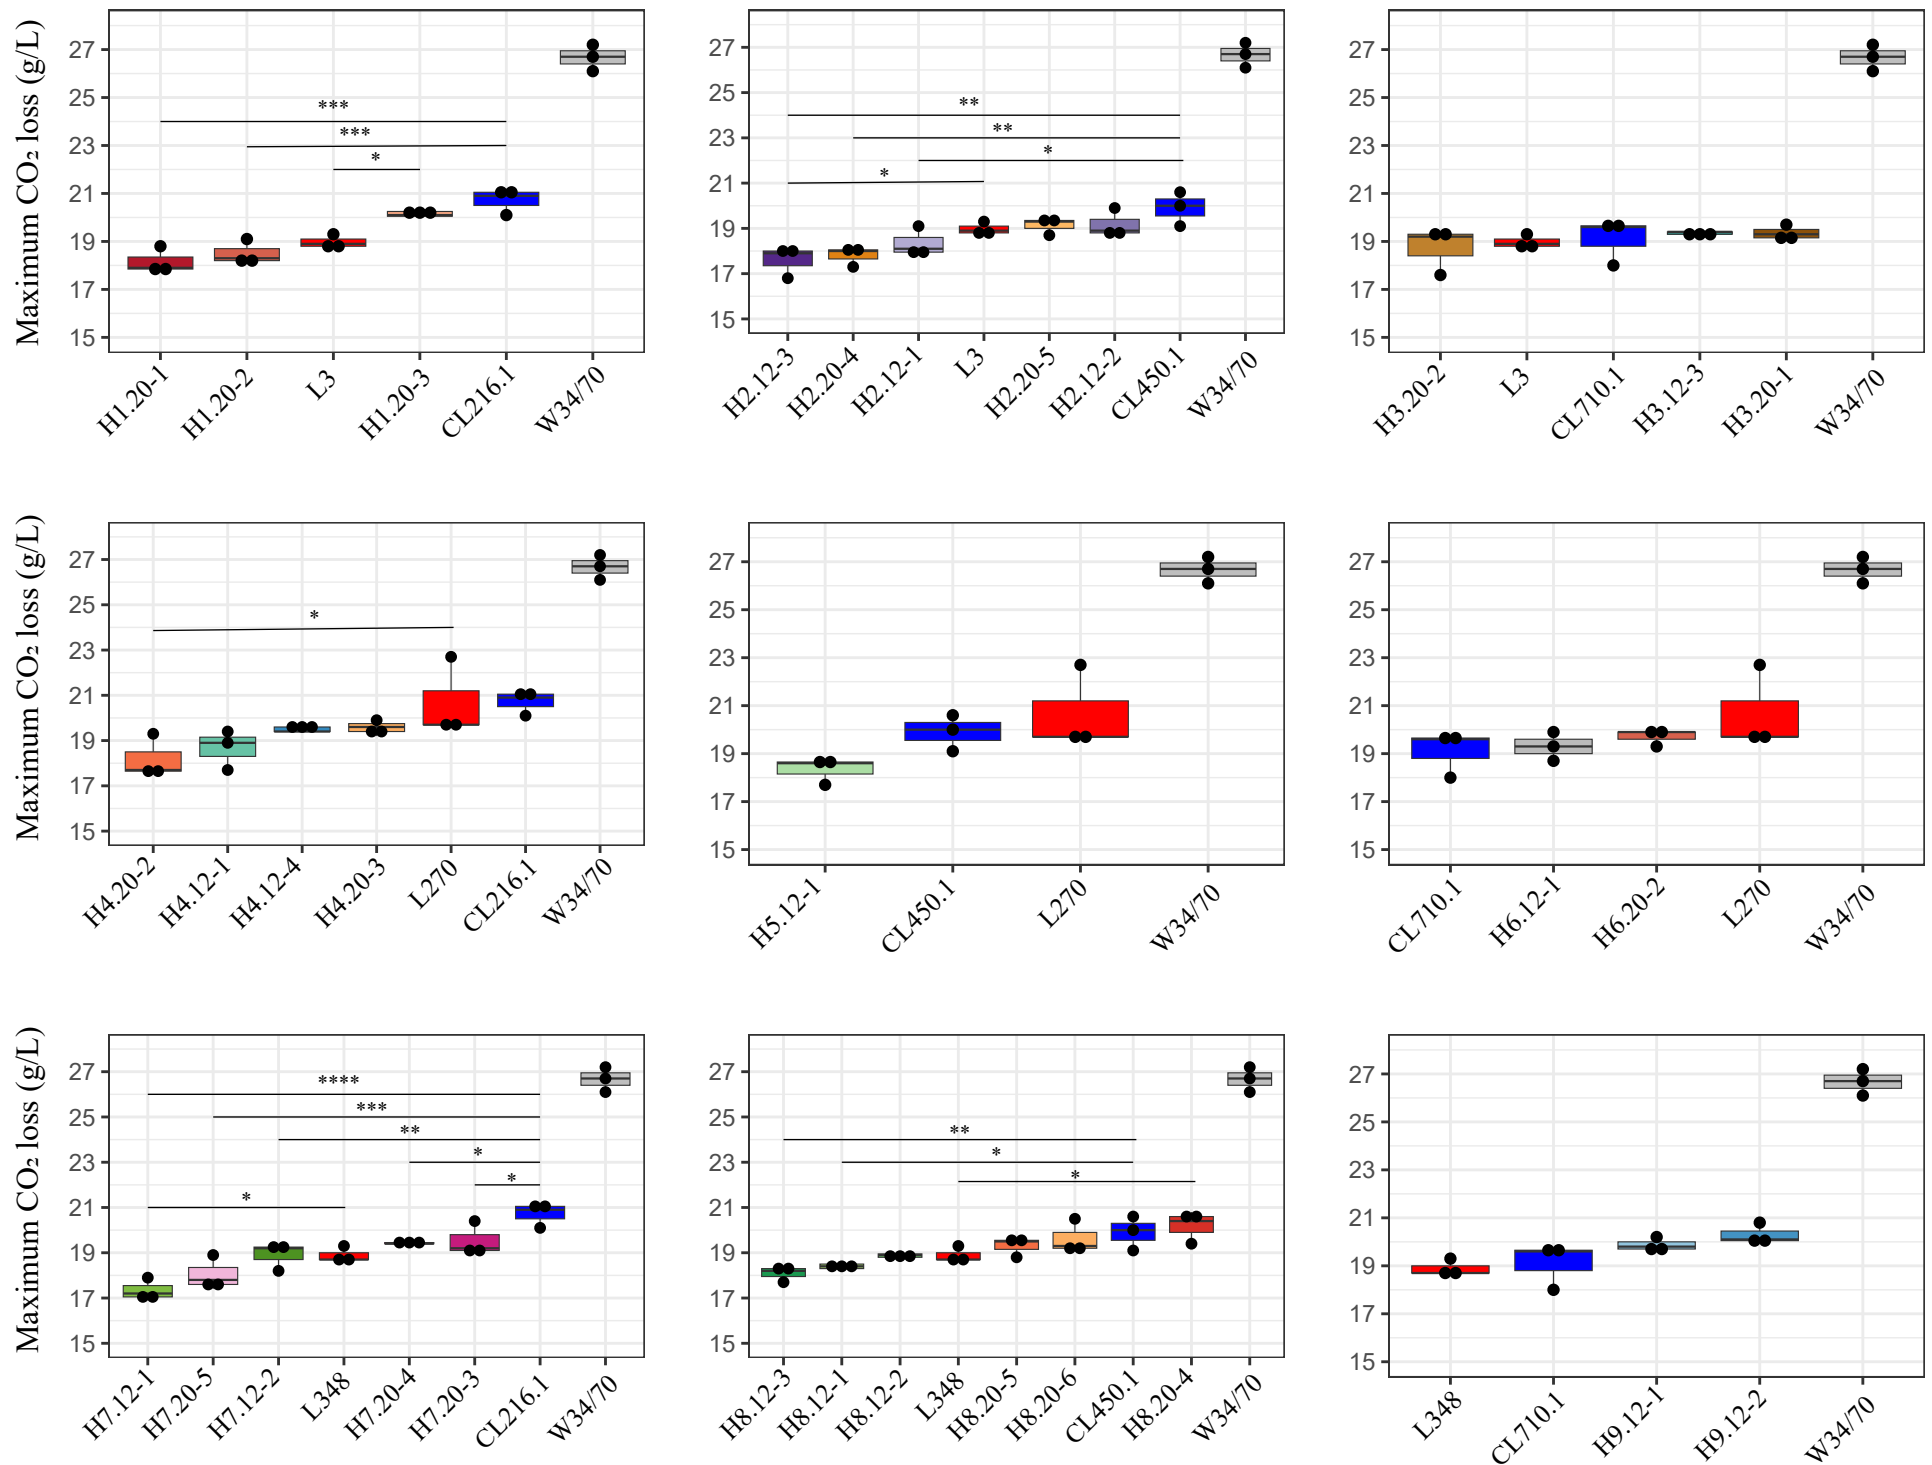

**Figure S3. Fermentative capacity at 12 °C of each hybrid.** Each plot represent a different cross. The (\*) represents different levels of significance between the phenotype of hybrids and their respective parental strain (t-test; \* $p \leq 0.05$ , \*\* $p \leq 0.01$ , \*\*\* $p \leq 0.001$ , \*\*\*\* $p \leq 0.0001$ ).
