# Supplementary material for: Wild Patagonian yeast improve the evolutionary potential of novel interspecific hybrid strains for lager brewing
Source: PubMed Central journal article supplement (PMC11189258; doi:10.1371/journal.pgen.1011154), 2024-06-20
Supplement: pgen.1011154.s004.pdf [file pgen.1011154.s004.pdf]

## Fitness of evolved lines after 250 generations

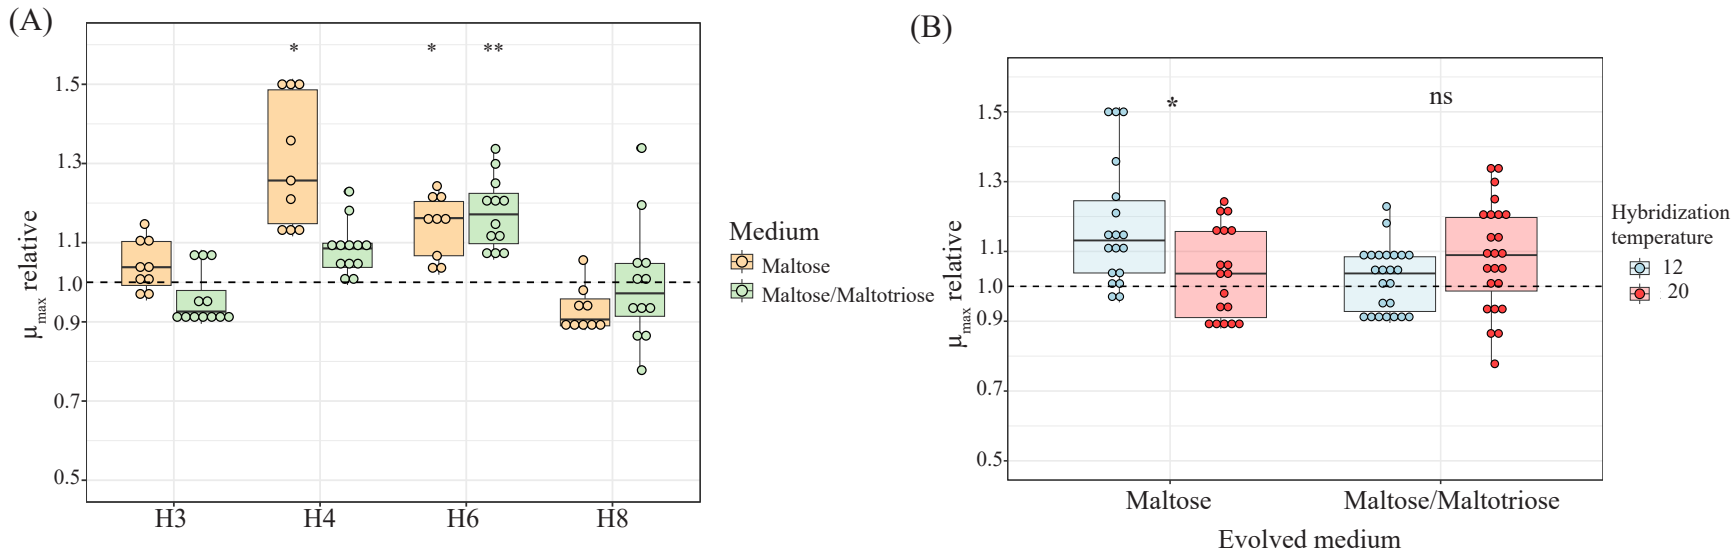

**Figure S4. Fitness comparison of evolved lines after 250 generations.** (A) Mean relative fitness (growth rate) of evolved lines after 250 generation under microculture conditions. Evolved lines were evaluated in the same medium where they were evolved (M or T medium). (B) Mean relative fitness (growth rate) comparison between evolved lines from hybrids generated at 12 and 20 °C. Plotted values correspond to the mean of three independent replicates of each evolved lines. The (\*) represents different levels of significance between evolved lines and unevolved hybrid in (A) and from hybrids generated at 12 °C vs 20 °C in (B) (Students t-test, \*  $p < 0.05$ , \*\*  $p < 0.01$ , ns not significant).
