# Supplementary material for: Wild Patagonian yeast improve the evolutionary potential of novel interspecific hybrid strains for lager brewing
Source: PubMed Central journal article supplement (PMC11189258; doi:10.1371/journal.pgen.1011154), 2024-06-20
Supplement: pgen.1011154.s005.pdf [file pgen.1011154.s005.pdf]

(A)

## Fitness of hybrids evolved in maltose

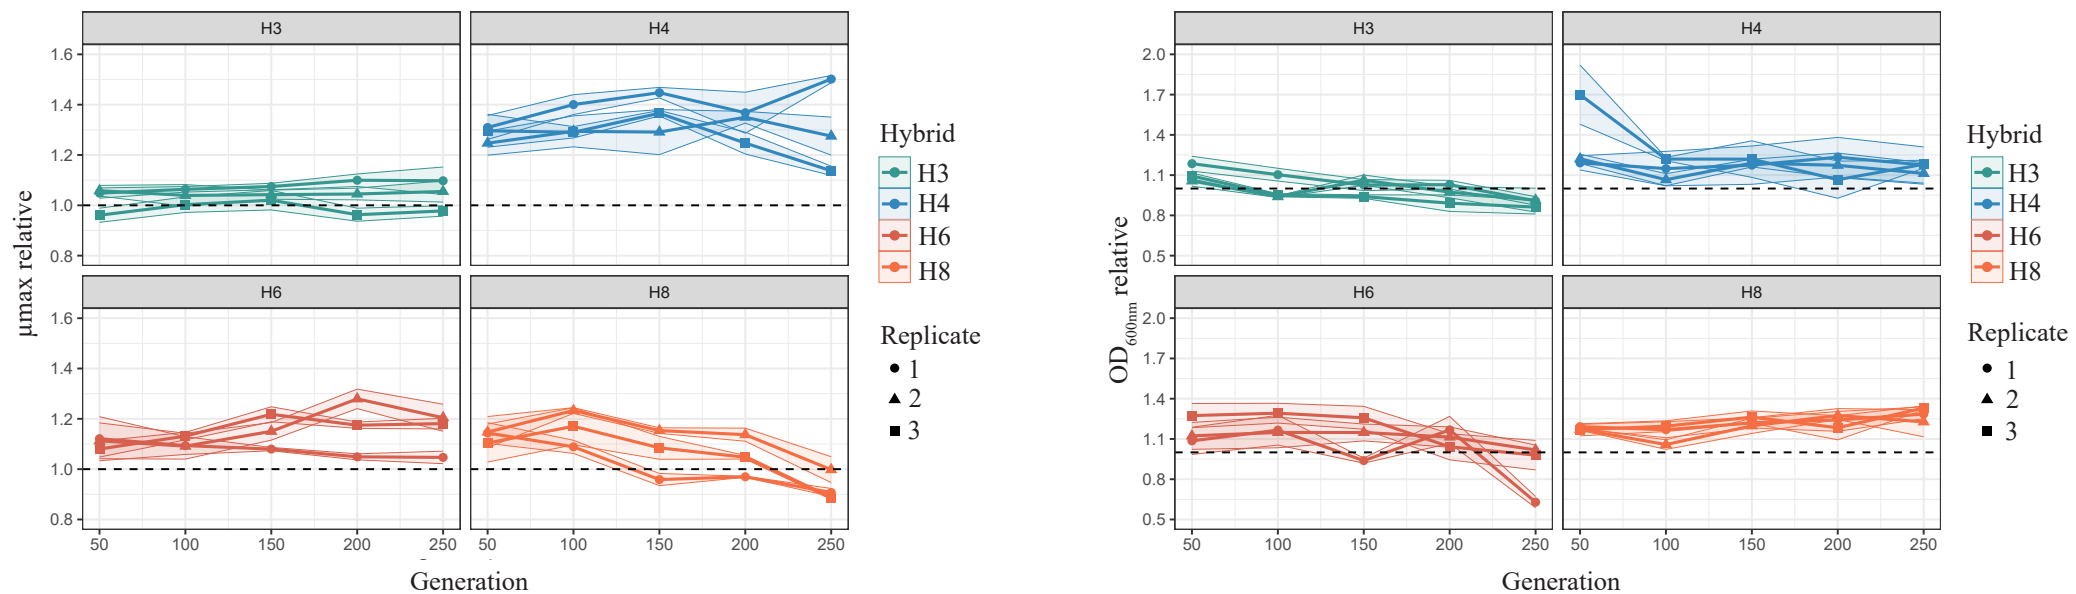

(B)

## Fitness of hybrids evolved in maltose with maltotriose

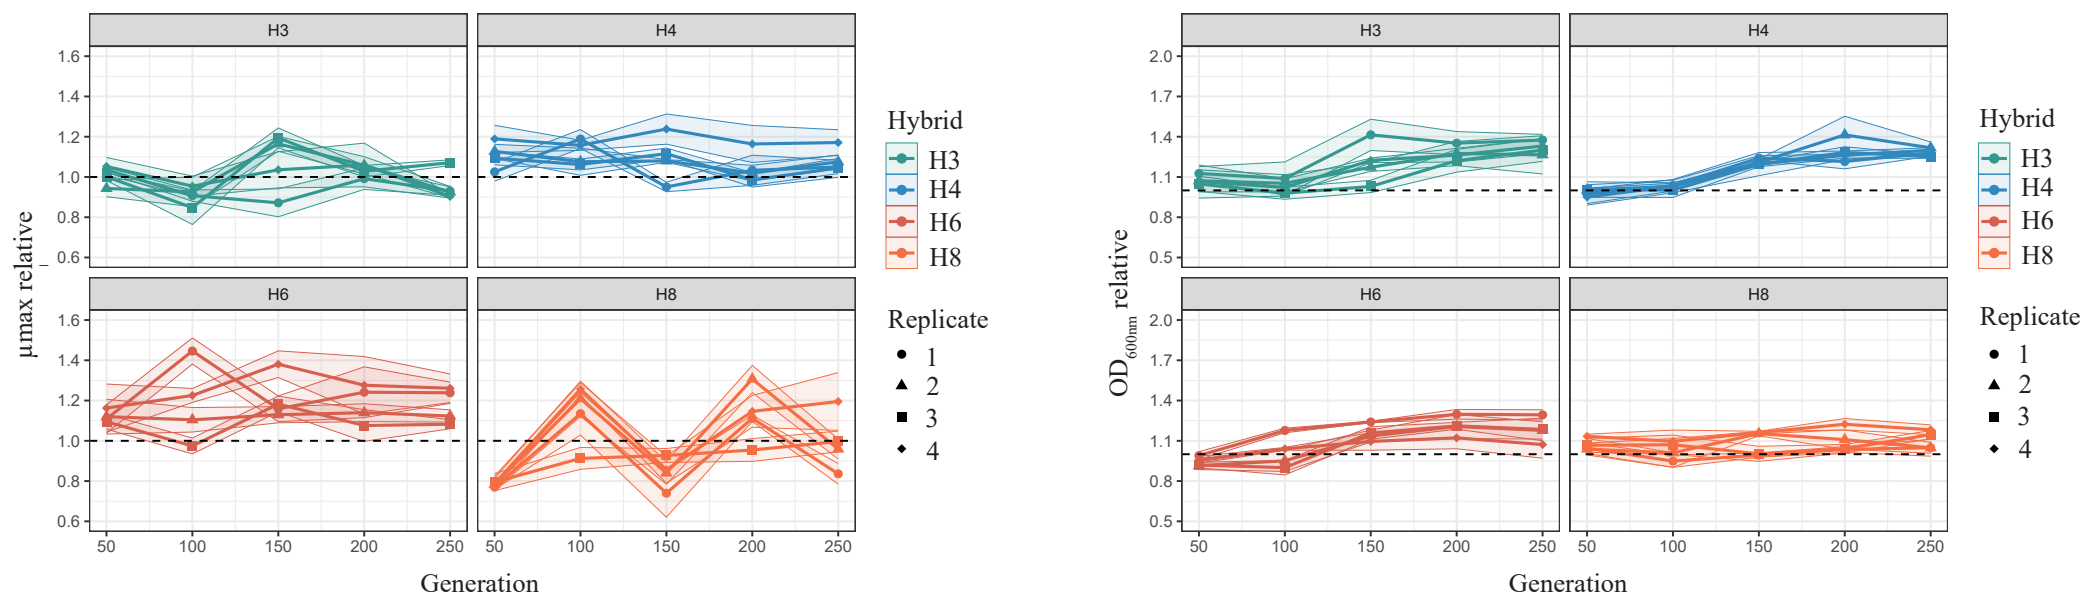

**Figure S5. Fitness dynamics of evolved lines in maltose and maltose with maltotriose.** (A) Mean relative fitness (growth rate and OD) of replicate population in 2% maltose. (B) Mean relative fitness (growth rate and OD) of replicate population in 1% maltose and 1% maltotriose. Plotted values correspond to the mean of three independent replicates of each evolved line. All values are relative to their respective ancestral hybrid.
