# Supplementary material for: Wild Patagonian yeast improve the evolutionary potential of novel interspecific hybrid strains for lager brewing
Source: PubMed Central journal article supplement (PMC11189258; doi:10.1371/journal.pgen.1011154), 2024-06-20
Supplement: pgen.1011154.s007.pdf [file pgen.1011154.s007.pdf]

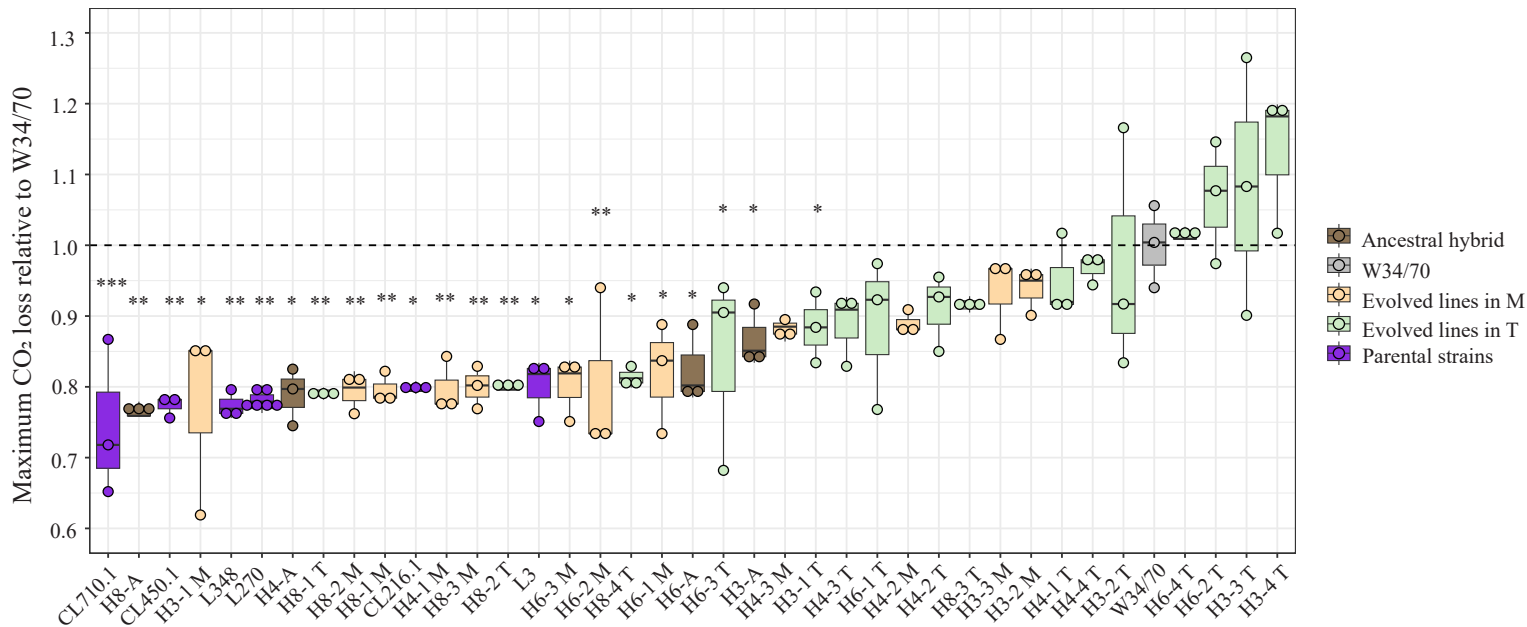

### Figure S7. Fermentative capacity of evolved individuals.

Fermentative capacity of evolved individuals relative to the commercial lager strain W34/70. Plotted values correspond to the mean of three independent replicates of each individual. The (\*) represent different levels of significance between strains and commercial lager strain (Students t-test, \*  $p < 0.05$ , \*\*  $p < 0.01$ , \*\*\*  $p < 0.001$ ).
