# Supplementary material for: Wild Patagonian yeast improve the evolutionary potential of novel interspecific hybrid strains for lager brewing
Source: PubMed Central journal article supplement (PMC11189258; doi:10.1371/journal.pgen.1011154), 2024-06-20
Supplement: pgen.1011154.s008.pdf [file pgen.1011154.s008.pdf]

H3-4

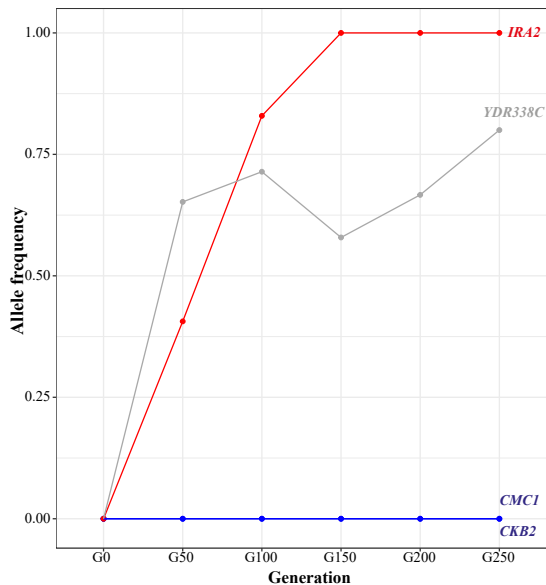

H4-1

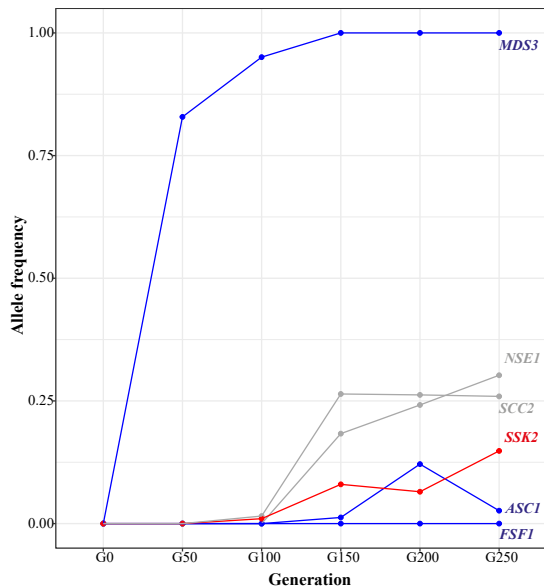

**Figure S8. Dynamics of molecular evolution.** Allele frequencies over time in H3-4 and H4-1 line evolved in T medium. In red and blue are highlighted SNPs in the genes present in the evolved individuals in the *S. cerevisiae* and *S. eubayanus* subgenomes, respectively.
