# Supplementary material for: Wild Patagonian yeast improve the evolutionary potential of novel interspecific hybrid strains for lager brewing
Source: PubMed Central journal article supplement (PMC11189258; doi:10.1371/journal.pgen.1011154), 2024-06-20
Supplement: pgen.1011154.s009.pdf [file pgen.1011154.s009.pdf]

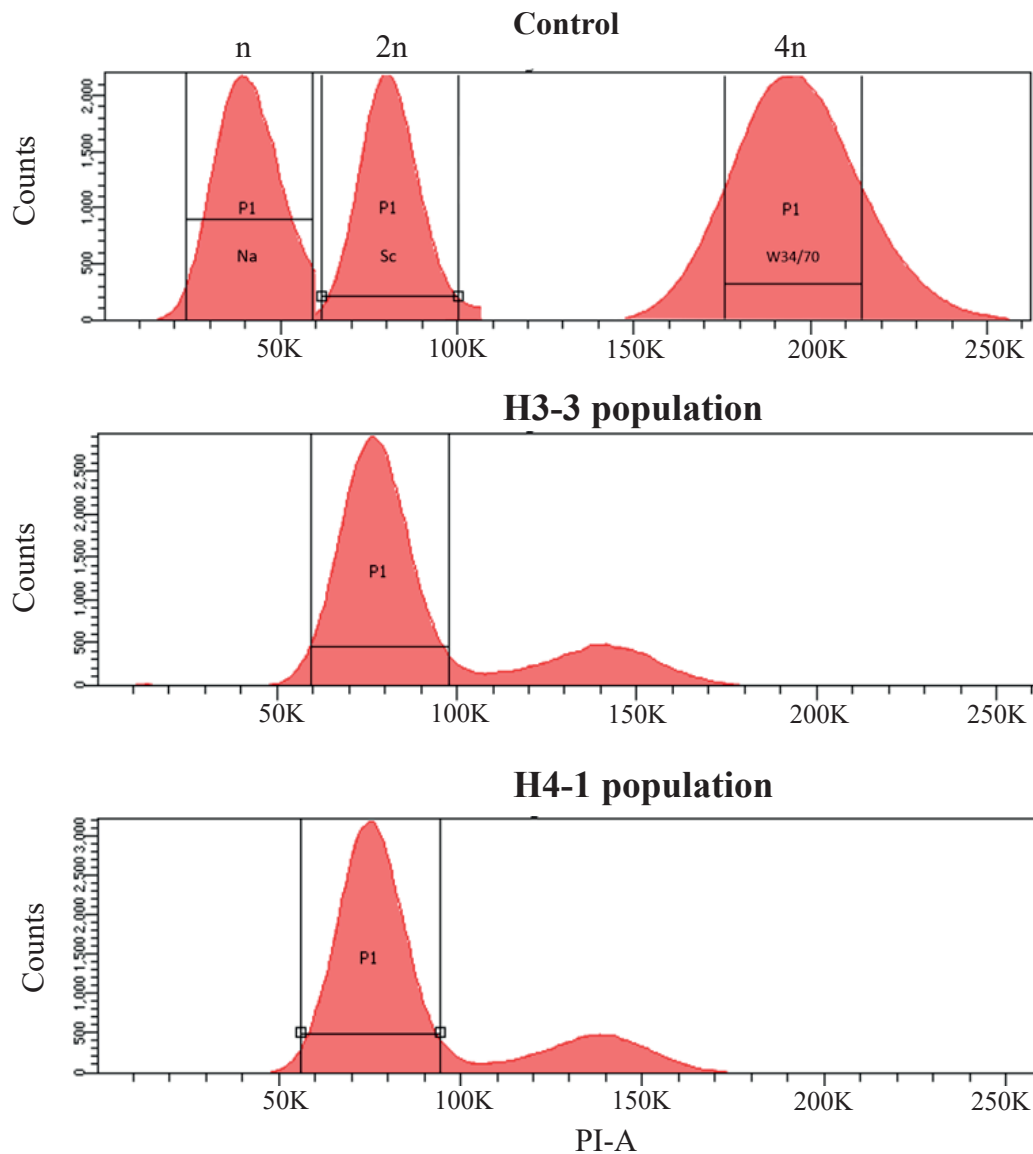

**Figure S9.** FACS analysis of H3-3 and H4-1 populations after 250 generations. The number of cells versus propidium iodide intensity is shown. Haploid (n), diploid (2n) and tetraploid (4n).
